# Supplementary material for: Some common deleterious mutations are shared in SARS-CoV-2 genomes from deceased COVID-19 patients across continents
Source: PubMed Central journal article supplement (PMC10616235; doi:10.1038/s41598-023-45517-1), 2023-10-30
Supplement: 41598_2023_45517_MOESM1_ESM.pdf [file 41598_2023_45517_MOESM1_ESM.pdf]

### Supplementary Information

**Table S1.** Amino acid mutations (**deleterious and non- deleterious**) predicted at various loci of SARS-CoV-2 genomes extracted from dead deceased people of five continents.

| <b>Fragment</b> | <b>Deleterious</b> | <b>Non-Deleterious</b> | <b>Percentage of Del Mutation</b> |
|-----------------|--------------------|------------------------|-----------------------------------|
| E               | 8                  | 12                     | 40.00%                            |
| M               | 8                  | 34                     | 19.05%                            |
| N               | 49                 | 263                    | 15.71%                            |
| ORF1a           | 236                | 1686                   | 12.28%                            |
| ORF1b           | 338                | 485                    | 41.07%                            |
| ORF3a           | 122                | 114                    | 51.69%                            |
| ORF6            | 23                 | 12                     | 65.71%                            |
| ORF7a           | 42                 | 39                     | 51.85%                            |
| ORF7b           | 10                 | 21                     | 32.26%                            |
| ORF8            | 45                 | 40                     | 52.94%                            |
| ORF9b           | 30                 | 26                     | 53.57%                            |
| S               | 40                 | 467                    | 7.89%                             |

**Figure**

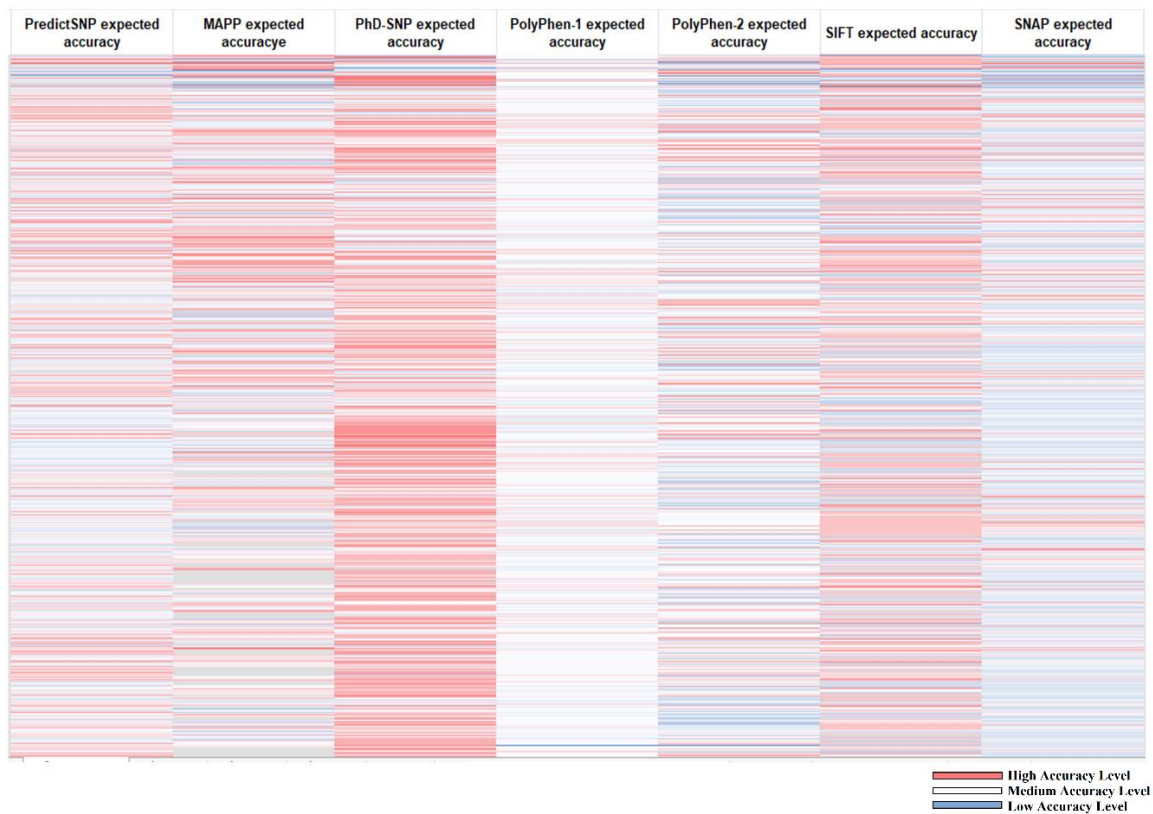

**Fig. S1:** Accuracy of predicting mutations by different tools.

### **Data Availability Statement**

GISAID Identifier: EPI\_SET\_230306ke

DOI: [10.55876/gis8.230306ke](https://doi.org/10.55876/gis8.230306ke)

All genome sequences and associated metadata in this dataset are published in GISAID's EpiCoV database. To view the contributors of each individual sequence with details such as accession number, Virus name, Collection date, Originating Lab and Submitting Lab and the list of Authors, visit [10.55876/gis8.230306ke](https://gisaid.org/230306ke)

#### **Data Snapshot**

- EPI\_SET\_230306ke is composed of 243,270 individual genome sequences.
- The collection dates range from 2020-01-08 to 2023-02-21;
- Data were collected in 158 countries and territories;
- All sequences in this dataset are compared relative to hCoV-19/Wuhan/WIV04/2019 (WIV04), the official reference sequence employed by GISAID (EPI\_ISL\_402124). Learn more at <https://gisaid.org/WIV04>.
